# Supplementary material for: Detecting labile heme and ferroptosis through ‘turn-on’ fluorescence and lipid droplet localization post Fe2+ sensing
Source: Royal Society of Chemistry journal article supplement (doi:10.1039/d4tb00353e), 2024-01-01
Supplement: d4tb00353e1.pdf [file d4tb00353e1.pdf]

Supporting Information

**Detecting Labile Heme and Ferroptosis Through ‘Turn-On’ Fluorescence  
and lipid droplet localization post Fe<sup>2+</sup> sensing**

Yogesh Dubey<sup>#</sup>, Shabnam Mansuri<sup>#</sup> and Sriram Kanvah<sup>\*</sup>

<sup>\*</sup>Department of Chemistry, Indian Institute of Technology Gandhinagar, Palaj, Gandhinagar,

Gujarat – 382055: Email: [sriram@iitgn.ac.in](mailto:sriram@iitgn.ac.in)

<sup>#</sup>Equal Authorship

**Table of Contents**

|            |                                                                                                            |
|------------|------------------------------------------------------------------------------------------------------------|
| S1         | Synthetic procedure                                                                                        |
| Figure S2  | Response to Fe(II) by <b>NOPy</b>                                                                          |
| Figure S3  | Absorption and emission titration with varying concentrations of Fe(II) for <b>NOPy</b>                    |
| Figure S4  | LOD for <b>NOPy</b> and <b>NOCN</b> .                                                                      |
| Table S5   | Comparison of <b>NOPy</b> and <b>NOCN</b> with several recently reported probes to detect Fe <sup>2+</sup> |
| Figure S6  | Selectivity and strip test of <b>NOCN</b>                                                                  |
| Figure S7  | Comparative NMR spectra for <b>NPY</b> vs <b>DNO</b> vs <b>NOPy</b>                                        |
| Figure S8  | Cell viability                                                                                             |
| Figure S9  | Solubility test                                                                                            |
| Figure S10 | Response to pH                                                                                             |
| S11        | Characterization data                                                                                      |
| S12        | References                                                                                                 |

## S1. Synthetic procedure

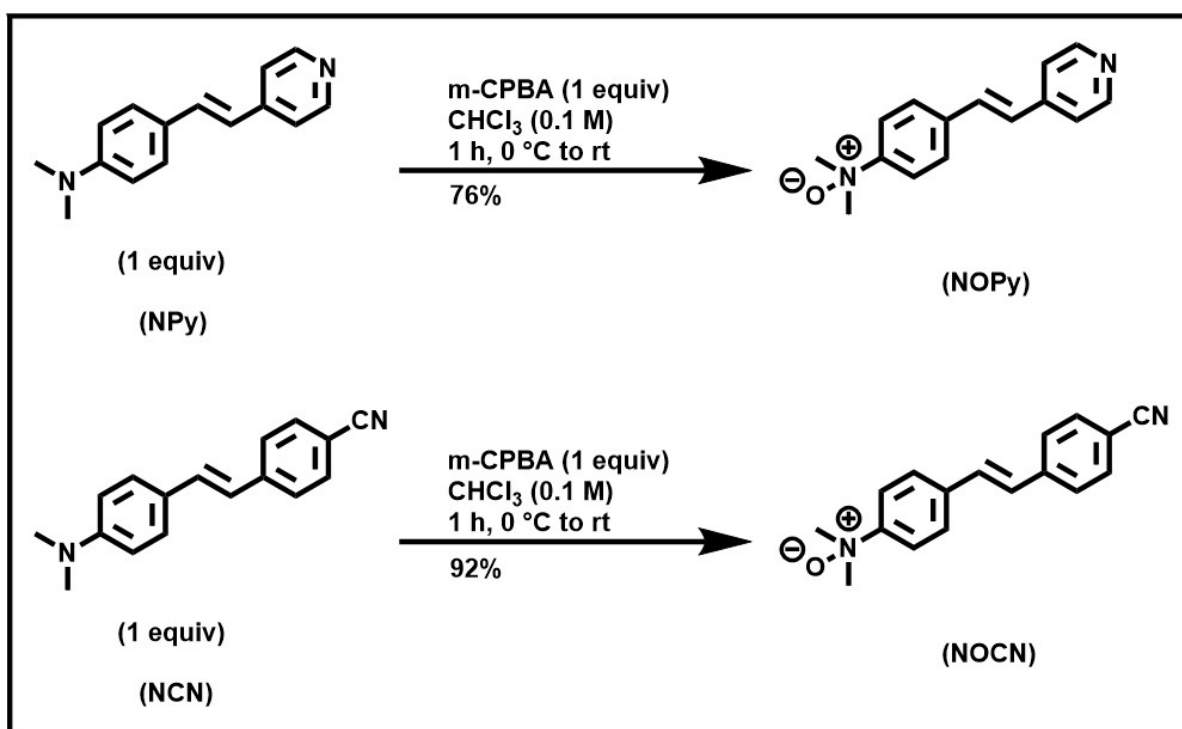

**General procedure:** NPy/NCN (1 equiv) in chloroform (0.1M) was placed in a round-bottomed flask, and m-CPBA (1 equiv) was added in small portions with the temperature maintained at 0 °C. The reaction mixture was gradually brought to room temperature and stirred for 1 hour until all the starting material was consumed, as monitored on a chromatographic TLC plate. Upon completion of the reaction, chloroform was evaporated using a rotary evaporator, and the residue was directly loaded onto a basic alumina oxide stationary phase, isolated, and weighed”

For NOPy, TLC system – 10 % methanol in DCM – R<sub>f</sub> (0.45). Column eluent – 1 to 8 % gradient elution of methanol in DCM;

For NOCN, TLC system – 5 % methanol in Dichloromethane – R<sub>f</sub> (0.30); Column eluent – 1 to 8 % gradient elution of methanol in Dichloromethane.

The compounds NPy and NCN were synthesized from the literature procedure<sup>1,2</sup>.

**Figure S2. Response to Fe<sup>2+</sup> by NOPy**

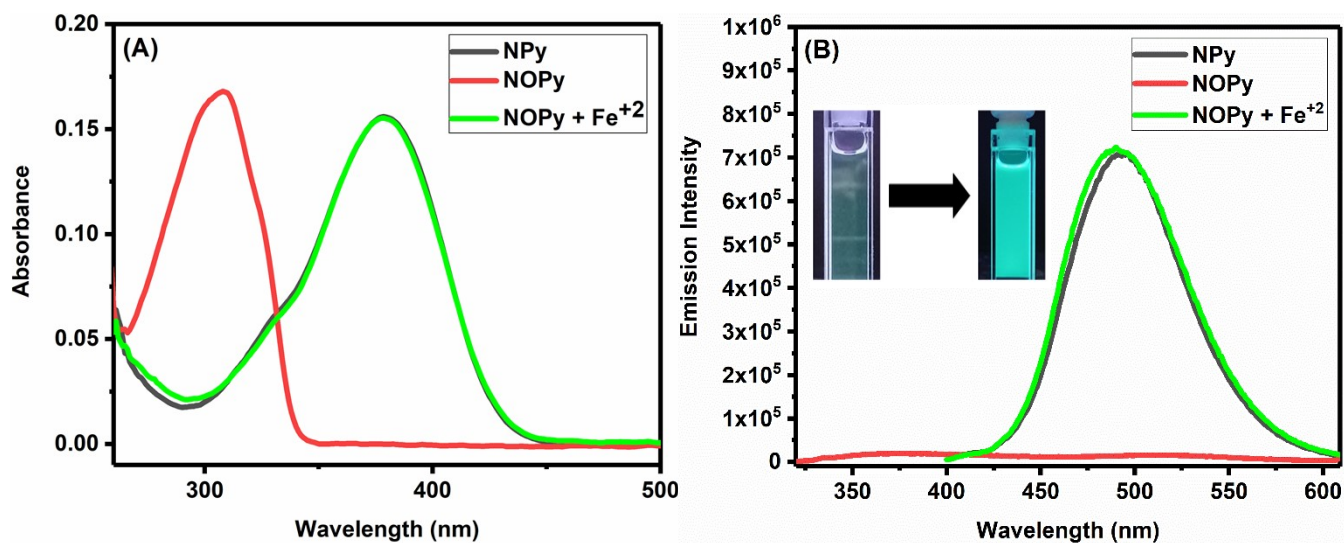

**Fig. S2** Comparative (A) Absorption spectra of NOPy, NOPy, NOPy with Fe<sup>2+</sup> and (B) Emission spectra for NOPy, NOPy, NOPy with Fe<sup>2+</sup> in DMSO [20  $\mu$ M of dye (in DMSO) and 20  $\mu$ M of Fe<sup>2+</sup> (in water)]

**Figure S3. Absorption and emission titration with varying concentration of Fe<sup>2+</sup> for NOPy (20 $\mu$ M)**

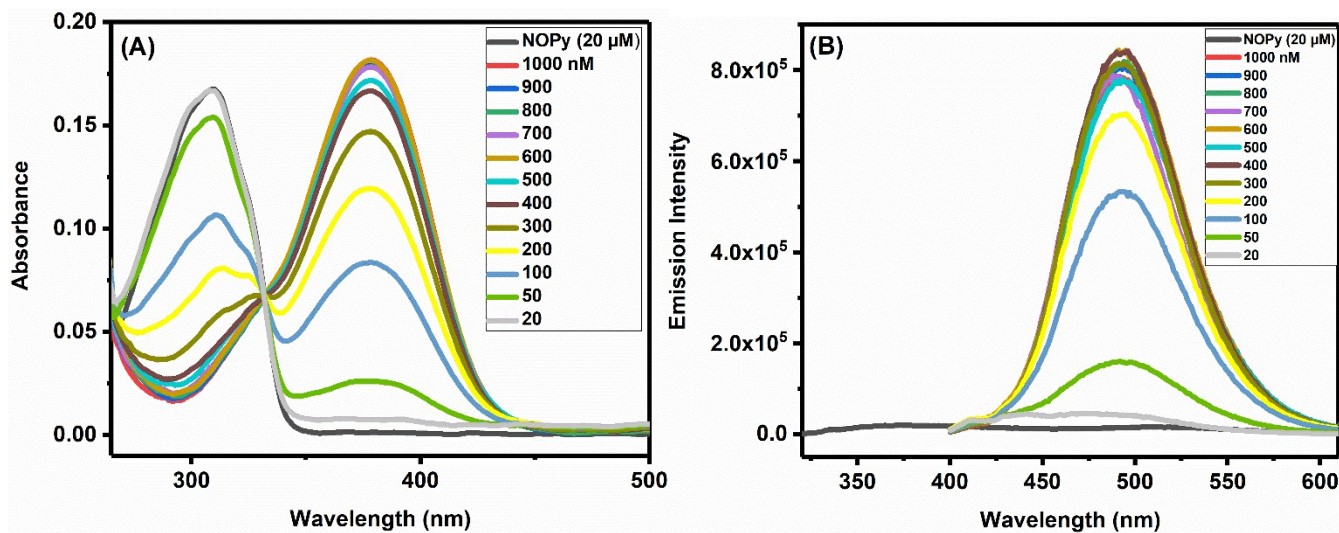

**Fig. S3** (A) Absorption titration with varying concentration of Fe<sup>2+</sup> in DMSO (B) Emission titration with varying concentration of Fe<sup>2+</sup>

### Figure S4. Limit of detection

The detection limit of the probe can be calculated using the formula -  $LOD = (3 \times R^2)/m$ , where  $R^2$  is R-square and  $m$  is the slope of the  $F/F_0$  versus  $Fe^{2+}$  concentration. To get the slope, the  $F/F_0$  at 490 nm and 536 nm for NOPy and NOCN, respectively, was plotted against a concentration of  $Fe^{2+}$ .

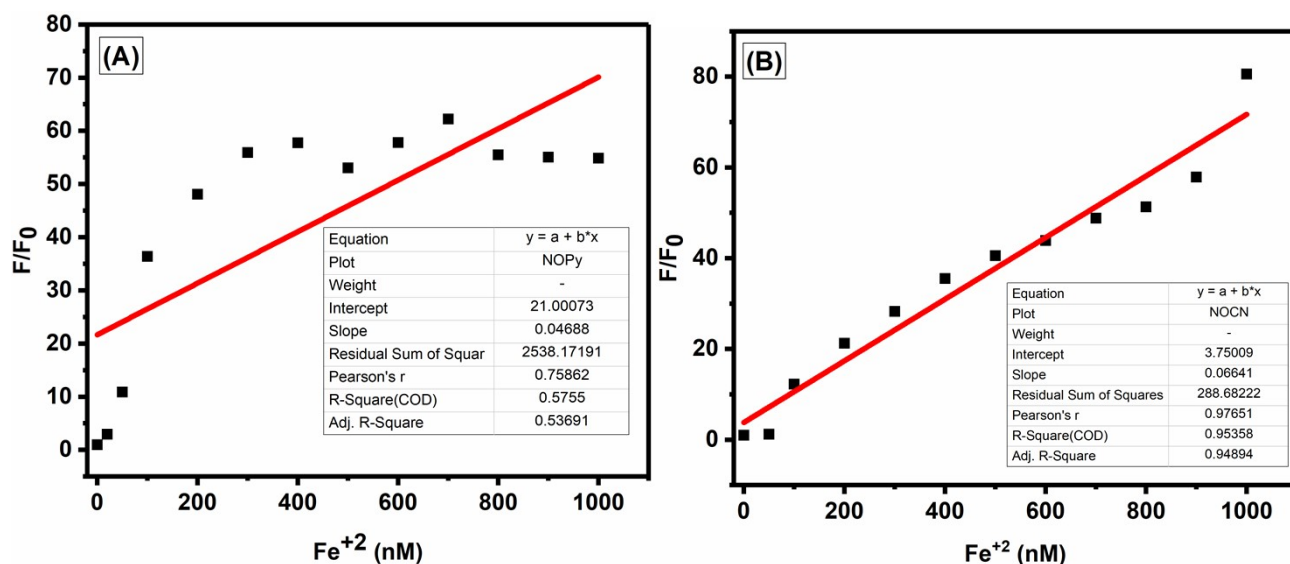

Fig. S4 LOD plot for (A) NOPy and (B) NOCN

Table S5. Comparison of NOPy and NOCN with several recently reported N-oxide probes for the detection of  $Fe^{2+}$

| Probe                                                                                         | Time (min)         | LOD ( $\mu M$ )           | Reference                         |
|-----------------------------------------------------------------------------------------------|--------------------|---------------------------|-----------------------------------|
| 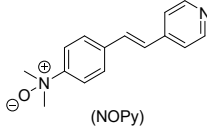<br>(NOPy) | Instant<br>(~0.16) | NOPy- 0.035<br>NOCN-0.042 | This work                         |
| <br>(NOCN) |                    |                           |                                   |
|            | 30                 | 0.81                      | Metallomics, 2018, 10(6), 794-801 |

|                                                                                     |    |      |                                                     |
|-------------------------------------------------------------------------------------|----|------|-----------------------------------------------------|
| 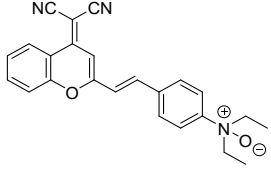   | 15 | 4.5  | Sensors Actuators B: Chem., 2019, 288, 217-224.     |
|    | 20 | 0.2  | Org. Biomolecular Chem. 2014, 12(34), 6590-6597     |
|    | -  | 0.2  | Chemical science, 2013, 4(3), 1250-1256             |
|    | 5  | 0.15 | Sensors Actuators B: Chem. 2020, 305, 127470.       |
|   | 30 | -    | Chem. Science, 2017, 8(7), 4858-4866                |
|  | 30 | 1.03 | J. Photochem. Photobiol.B: Biol., 2020, 209, 111943 |
|  | 60 | 1.02 | Chemical Communications, 2019, 55(81), 12136-12139. |

**Figure S6.** Selectivity and strip test of NOCN

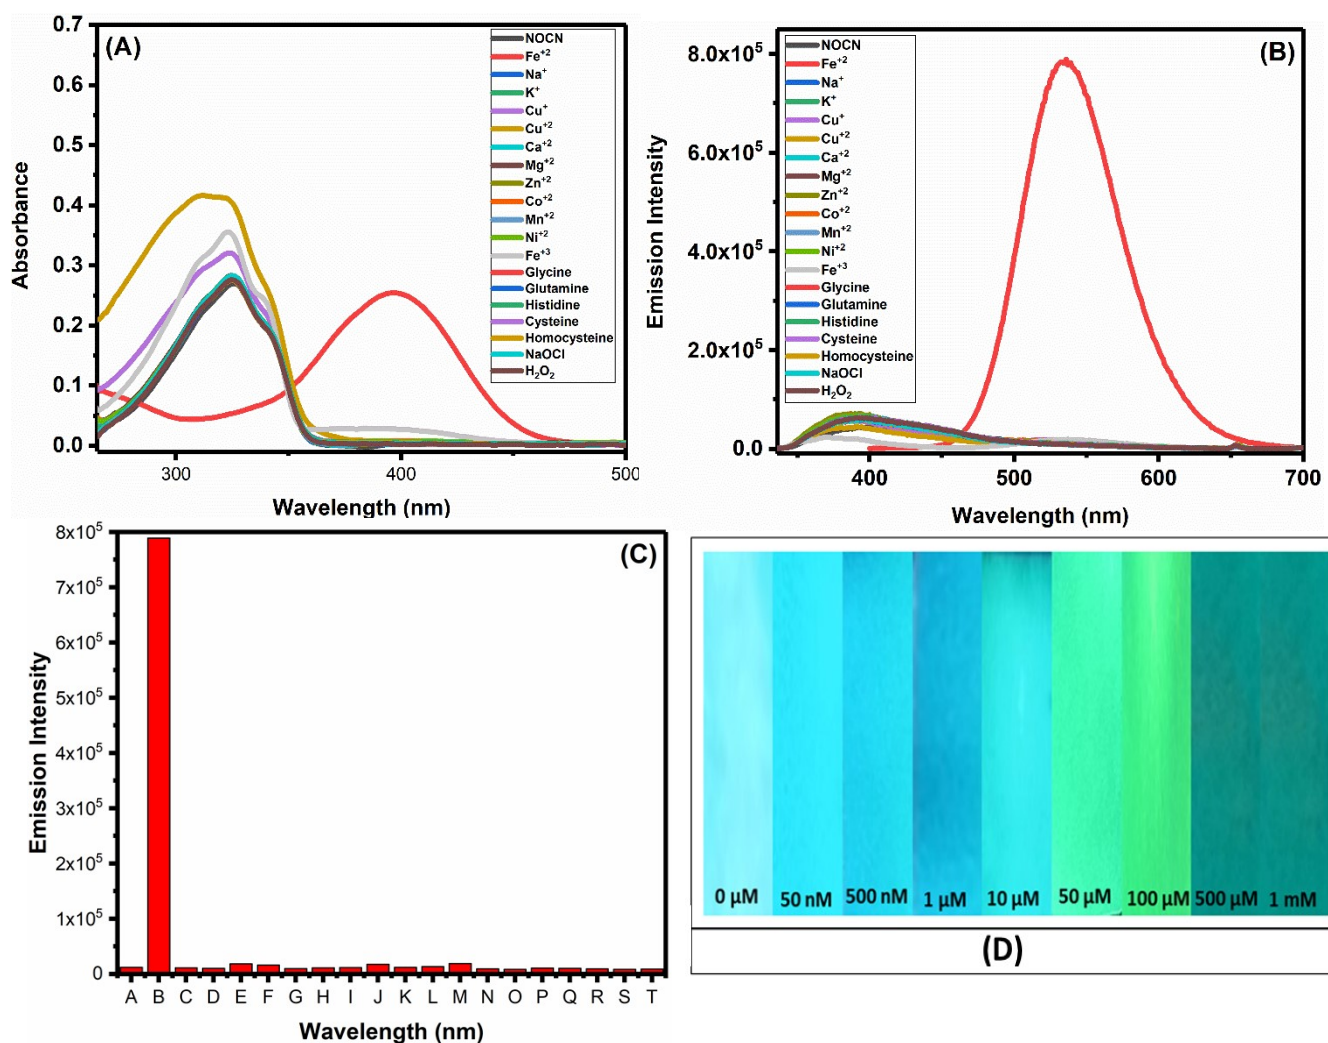

**Fig. S6** 20 μM probe titration against various 20 μM of analyte supplemented as their chloride salt (A) Absorption and (B) emission spectra for NOCN with different analytes in DMSO (C) Emission intensity changes for NOCN with Fe(II) compared with analytes [A to T = None, Fe<sup>2+</sup>, Na<sup>+</sup>, K<sup>+</sup>, Cu<sup>+</sup>, Cu<sup>2+</sup>, Ca<sup>2+</sup>, Mg<sup>2+</sup>, Zn<sup>2+</sup>, Co<sup>2+</sup>, Mn<sup>2+</sup>, Ni<sup>2+</sup>, Fe<sup>3+</sup>, Glycine, Glutamine, Histidine, Cysteine, Homocysteine, NaOCl, H<sub>2</sub>O<sub>2</sub> and (D) color variations as obtained through chromatographic strip paper (NOCN) in water (Fe<sup>2+</sup> conc. mentioned on strip paper).

Figure S7. Comparative NMR spectra for NPy<sup>2</sup> vs DNO<sup>3</sup> vs NOPy

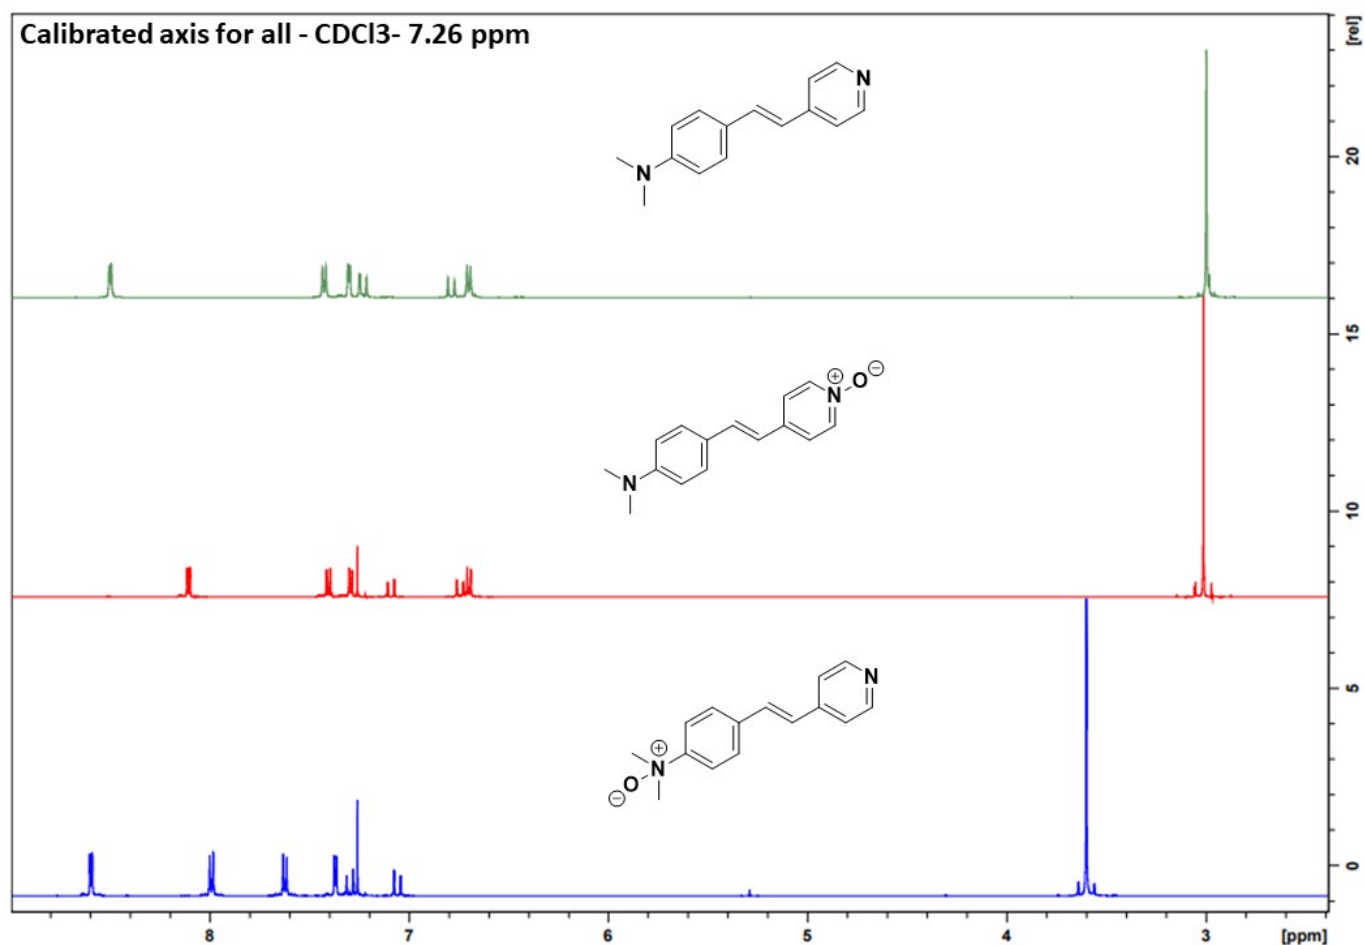

Figure S8. Cytotoxicity assay for NOPy and NOCN at various concentrations.

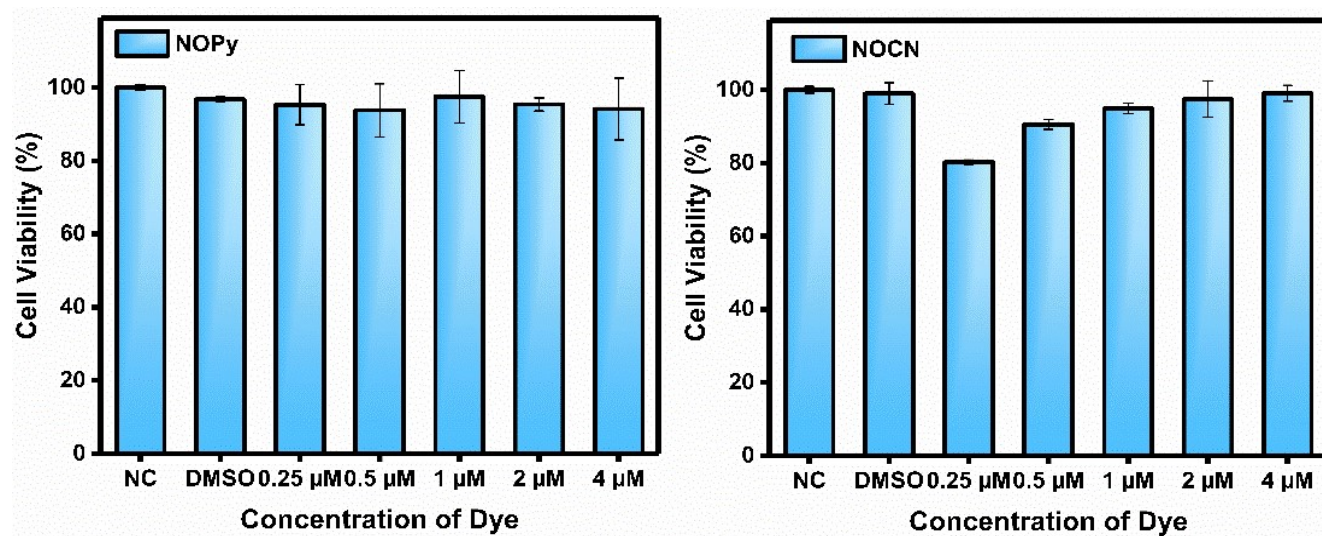

Figure S9. Solubility test

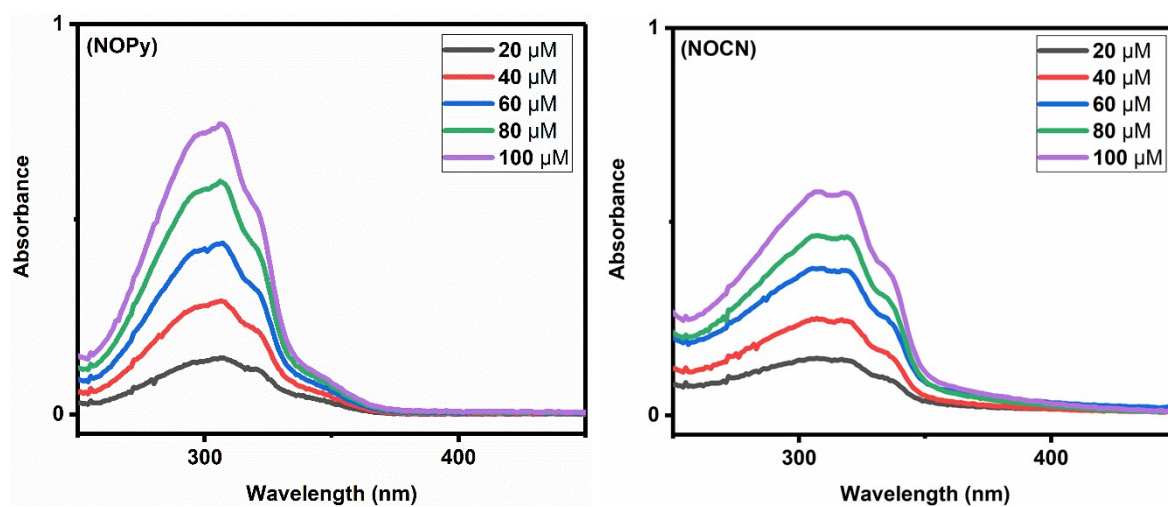

Fig S9A. Uv-Vis plot for NOPy (left panel) and NOCN (right panel) with increasing concentration of probe in water

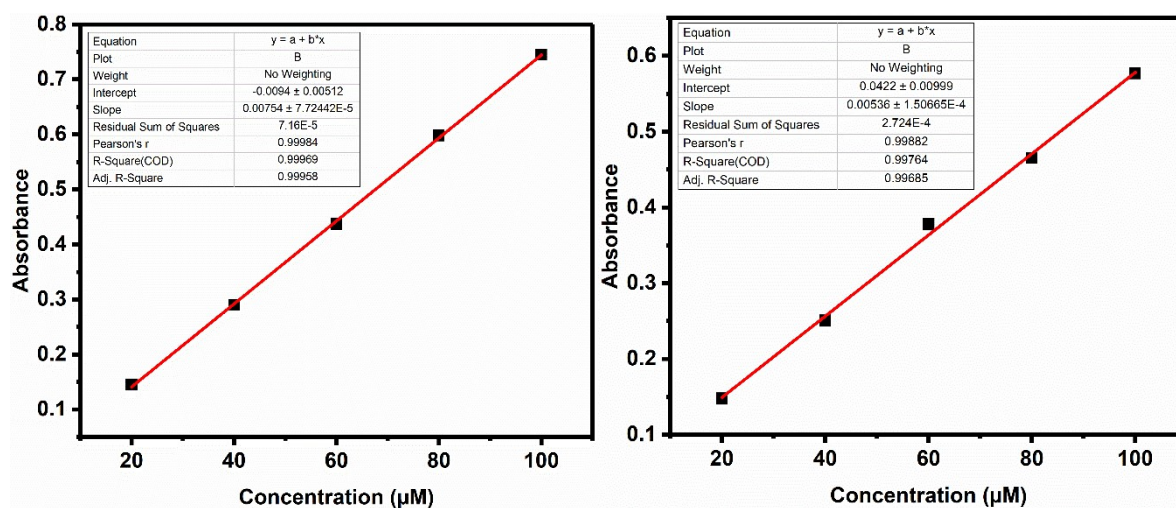

Fig S9B. Uv-Vis calibration curve plot for NOPy (left panel) and NOCN (right panel)



**Figure S10. Response to pH**

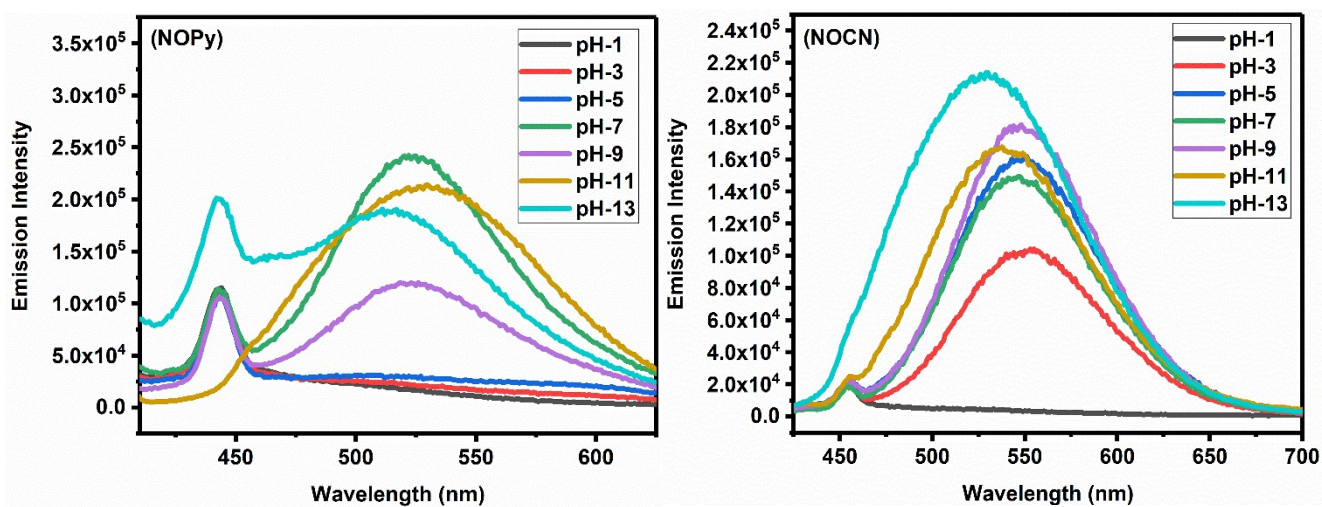

**Fig. S10** pH response of NOPy and NOCN at various pH

[20  $\mu$ M of dye (in DMSO) + 20  $\mu$ M of Fe(II) (in water)] is taken in water of pH-1,3,5,7,9,11,13.

## S11. Characterization Data

### 1. (E)-N,N-dimethyl-4-(2-(pyridin-4-yl)vinyl)aniline oxide (NOPy)

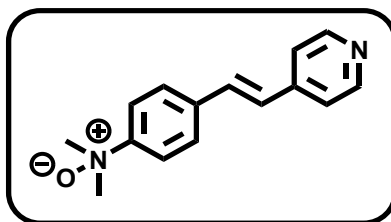

**<sup>1</sup>H NMR** (500 MHz, CDCl<sub>3</sub>): δ 8.61 (d, *J* = 5.0 Hz, 2H), 8.02 (d, *J* = 5.0 Hz, 2H), 7.64 (d, *J* = 5.0 Hz, 2H), 7.38 (d, *J* = 5.0 Hz, 2H), 7.31 (d, *J* = 15 Hz, 1H), 7.07 (d, *J* = 16.5 Hz, 1H), 3.61 (s, 6H). **<sup>13</sup>C NMR** (126 MHz; CDCl<sub>3</sub>) δ 154.39, 150.19, 143.89, 136.78, 131.19, 127.72, 127.46, 120.85, 120.53, 63.38. **HRMS** (ESI) *m/z* calcd for C<sub>15</sub>H<sub>17</sub>N<sub>2</sub>O<sup>+</sup> [M + H]<sup>+</sup> 241.1335, found 241.1317. IR in CHCl<sub>3</sub> (cm<sup>-1</sup>): 3020, 1595, 1503, 1459, 1418, 1214, 967, 835, 744, 667, 571. Melting point : 145-148 °C.

### 2. (E)-4-(4-cyanostyryl)-N,N-dimethylaniline oxide (NOCN)

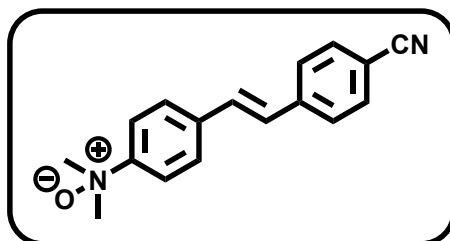

**<sup>1</sup>H NMR** (500 MHz, CDCl<sub>3</sub>): δ 7.94 (d, *J* = 8.5 Hz, 2H), 7.55 (m, 6H), 7.15 (d, *J* = 16.0 Hz, 1H), 7.06 (d, *J* = 16.0 Hz, 1H), 3.54 (s, 6H). **<sup>13</sup>C NMR** (126 MHz; CDCl<sub>3</sub>) δ 153.31, 140.20, 136.04, 131.53, 129.48, 127.52, 126.43, 126.05, 119.60, 117.87, 110.04, 62.42. **HRMS** (ESI) *m/z* calcd for C<sub>17</sub>H<sub>18</sub>N<sub>2</sub>O<sup>+</sup> [M + H]<sup>+</sup> 265.1335, found 265.1355. IR in CHCl<sub>3</sub> (cm<sup>-1</sup>): 3272, 2957, 2920, 2848, 2224, 1601, 1507, 1460, 1417, 1203, 969, 841, 770, 571. Melting point : 171-173 °C.

# 1. (E)-N,N-dimethyl-4-(2-(pyridin-4-yl)vinyl)aniline oxide (NOPy)

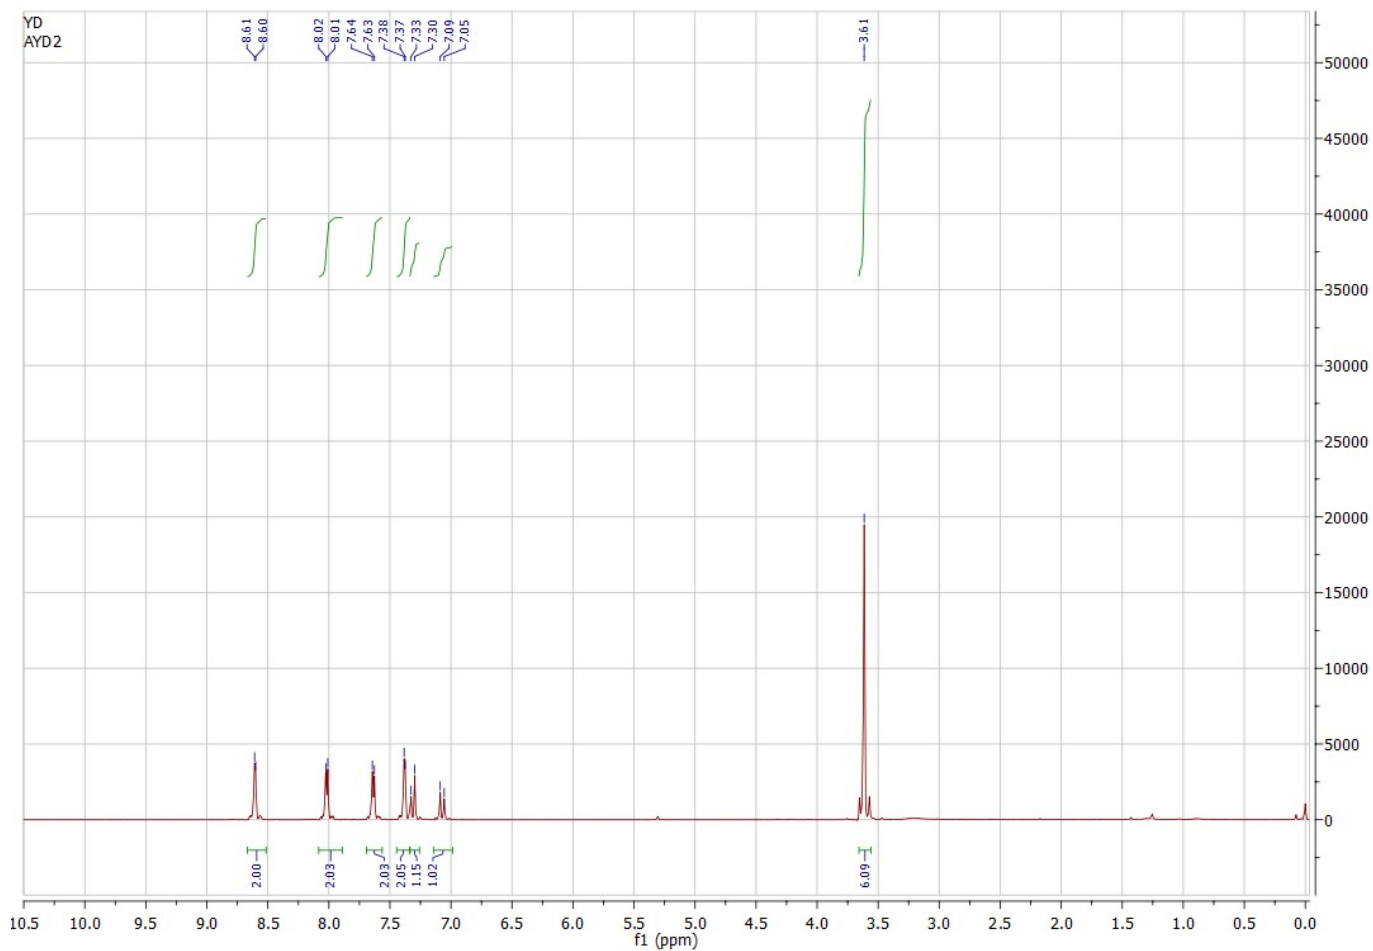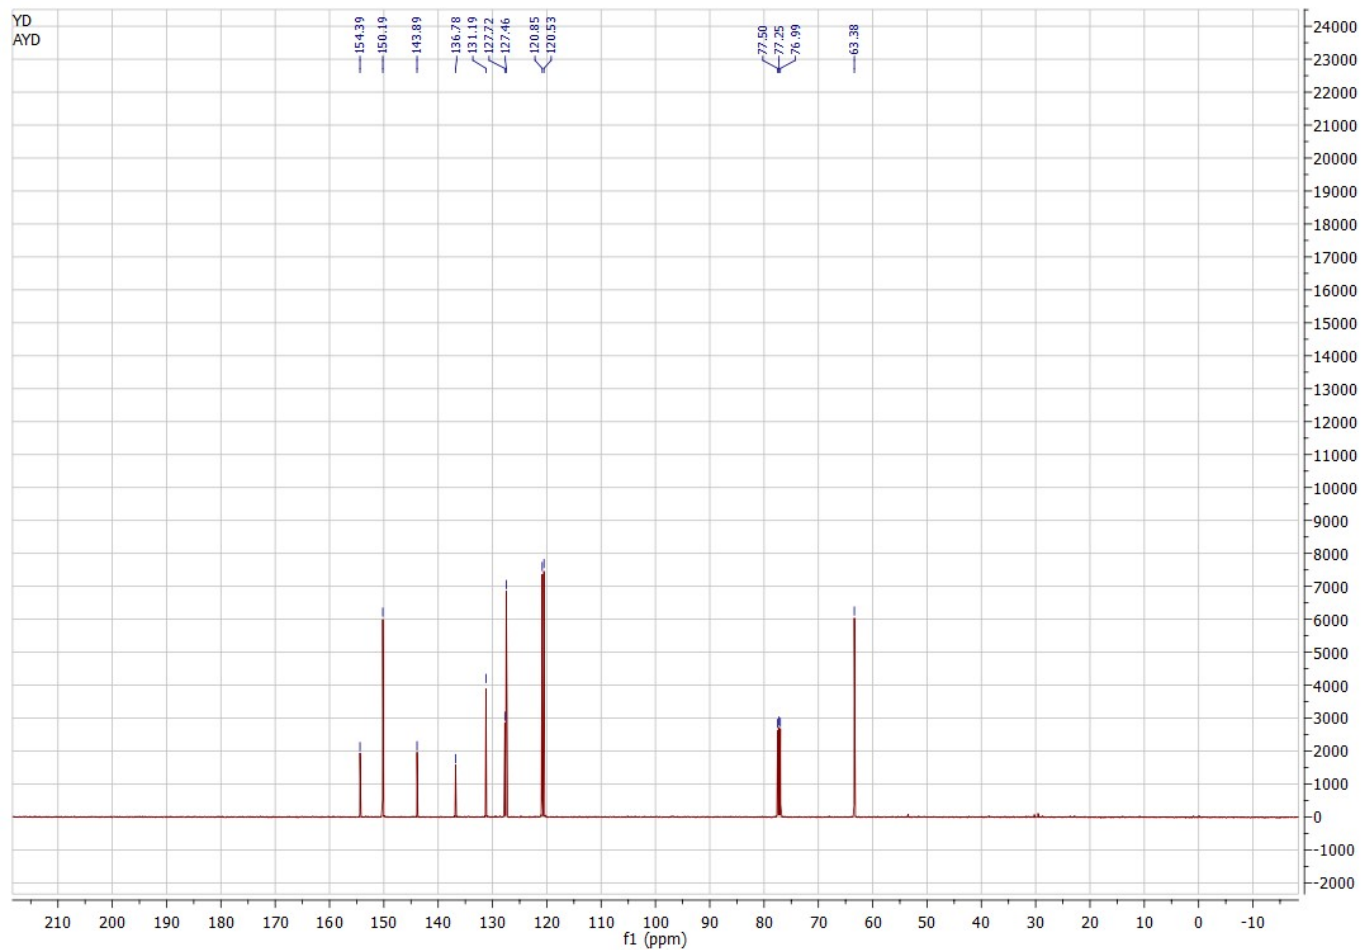

SKG\_YD\_K

IITGN\_POS\_31\_OCT\_2023\_36 80 (1.903)

1: TOF MS ES+  
4.16e5

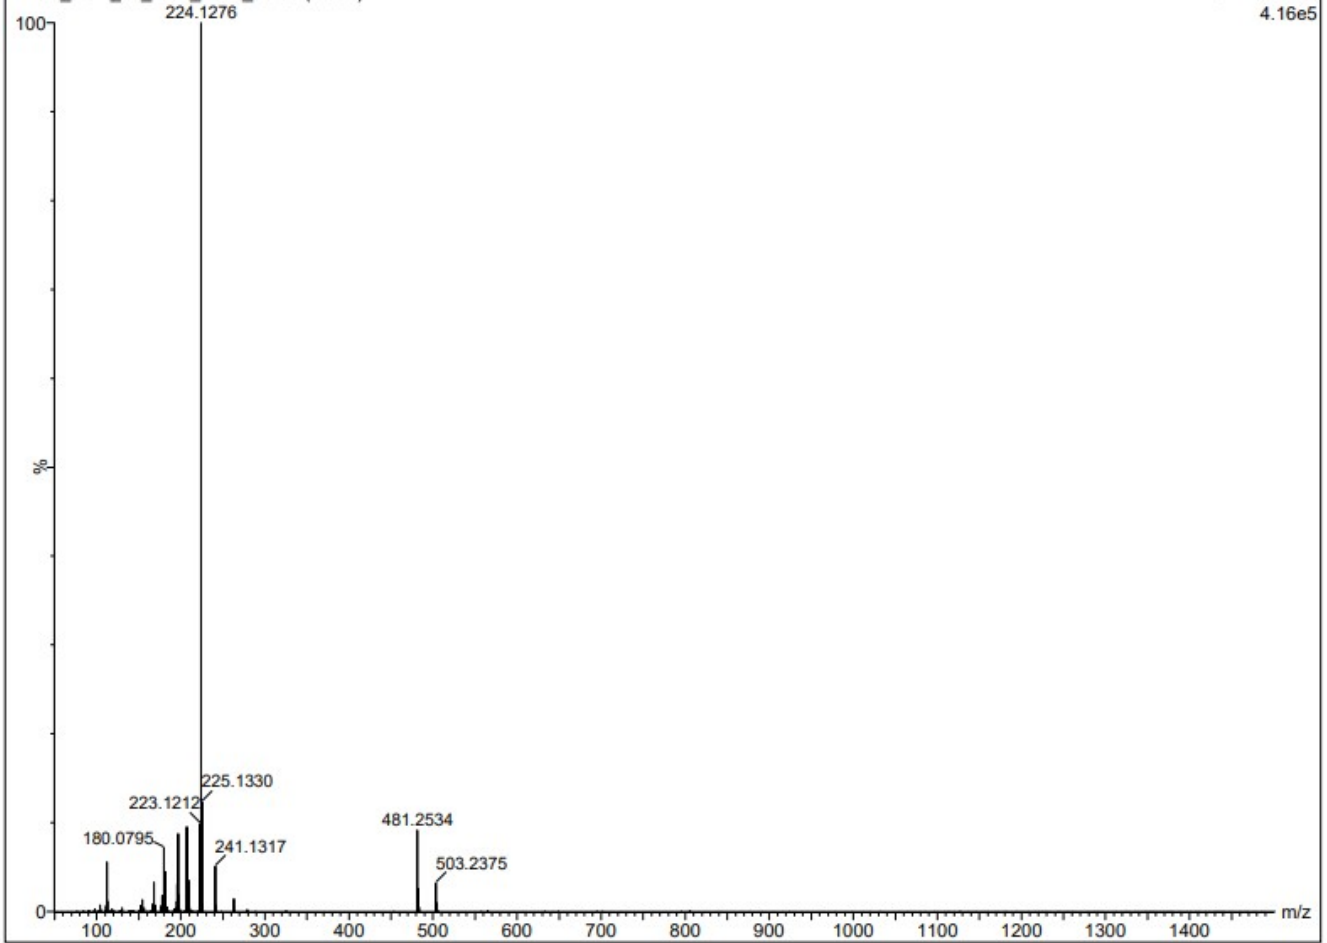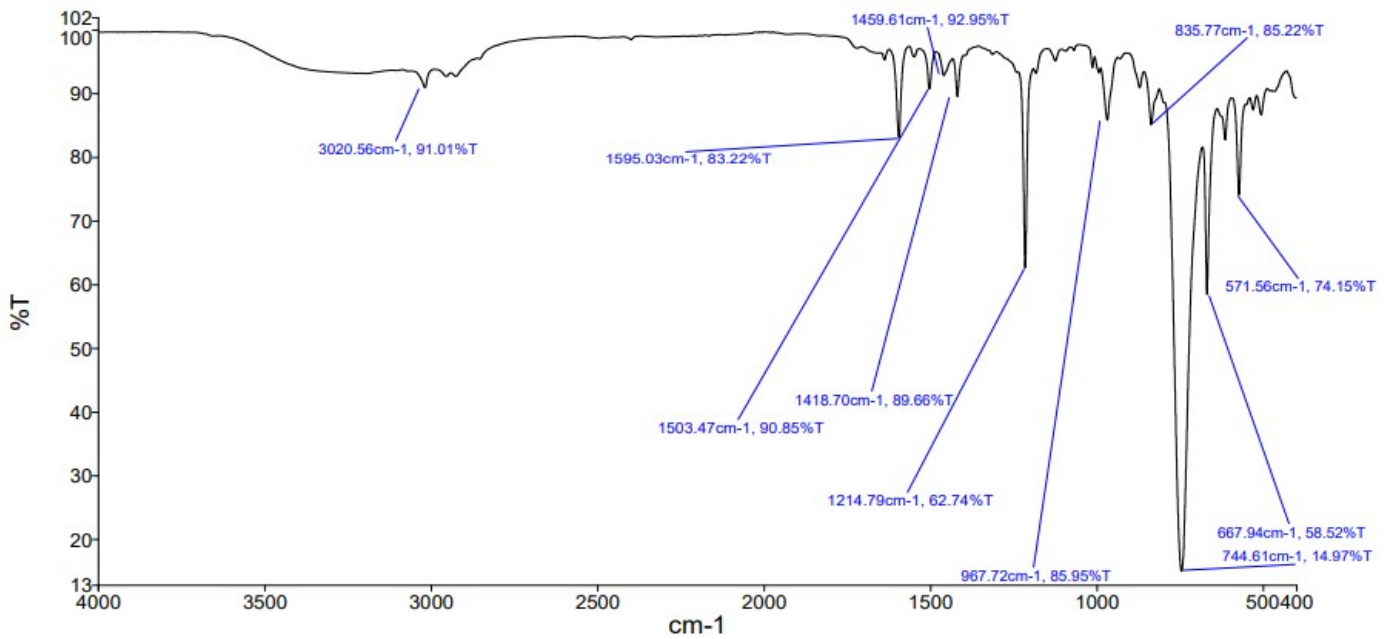

## 2. (E)-4-(4-cyanostyryl)-N,N-dimethylaniline oxide (NOCN)

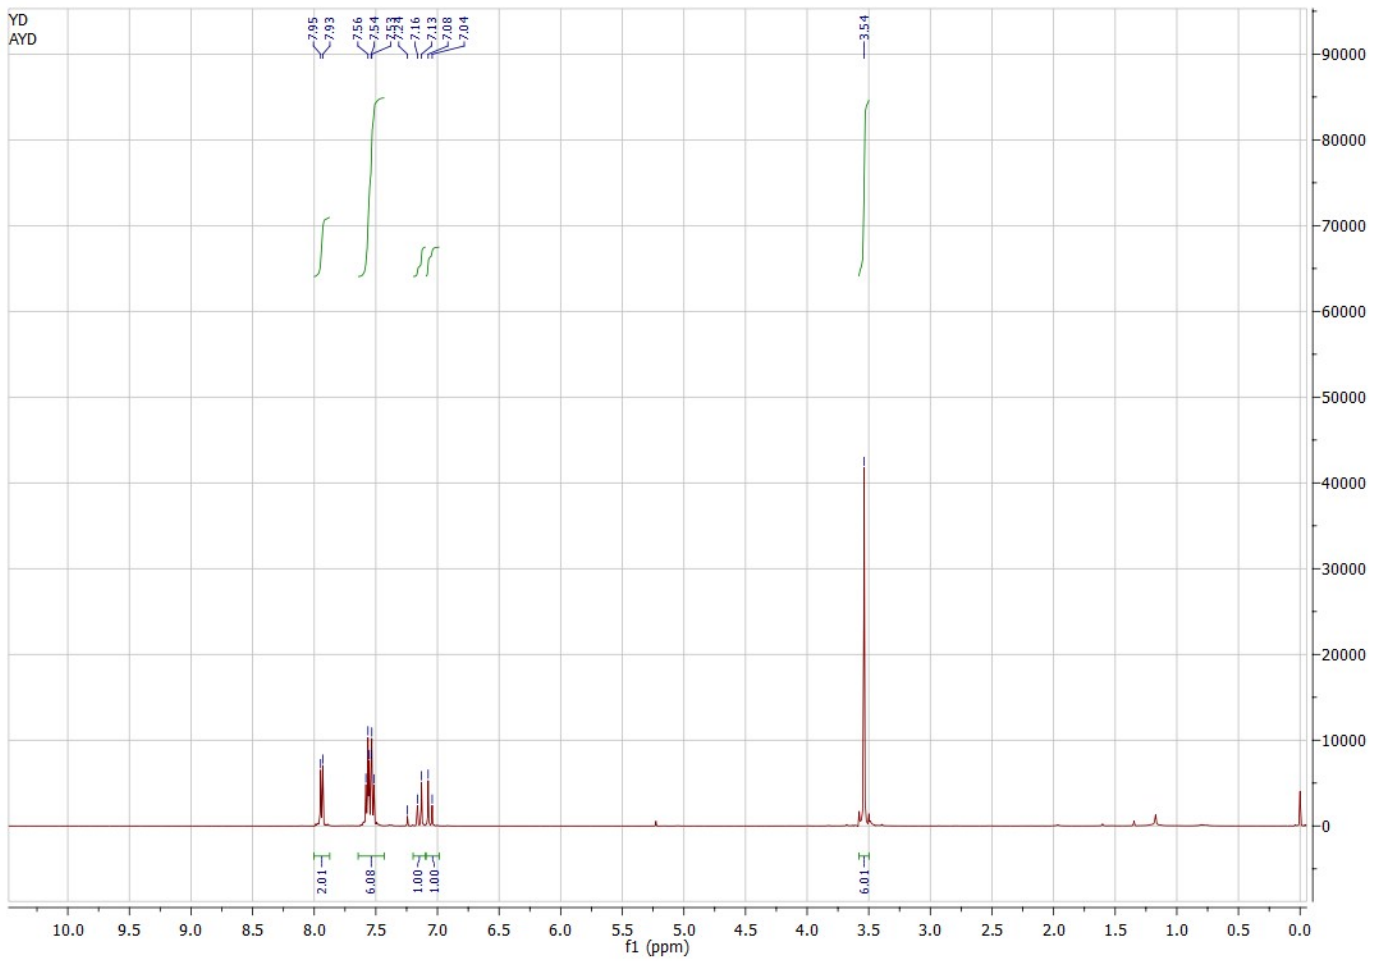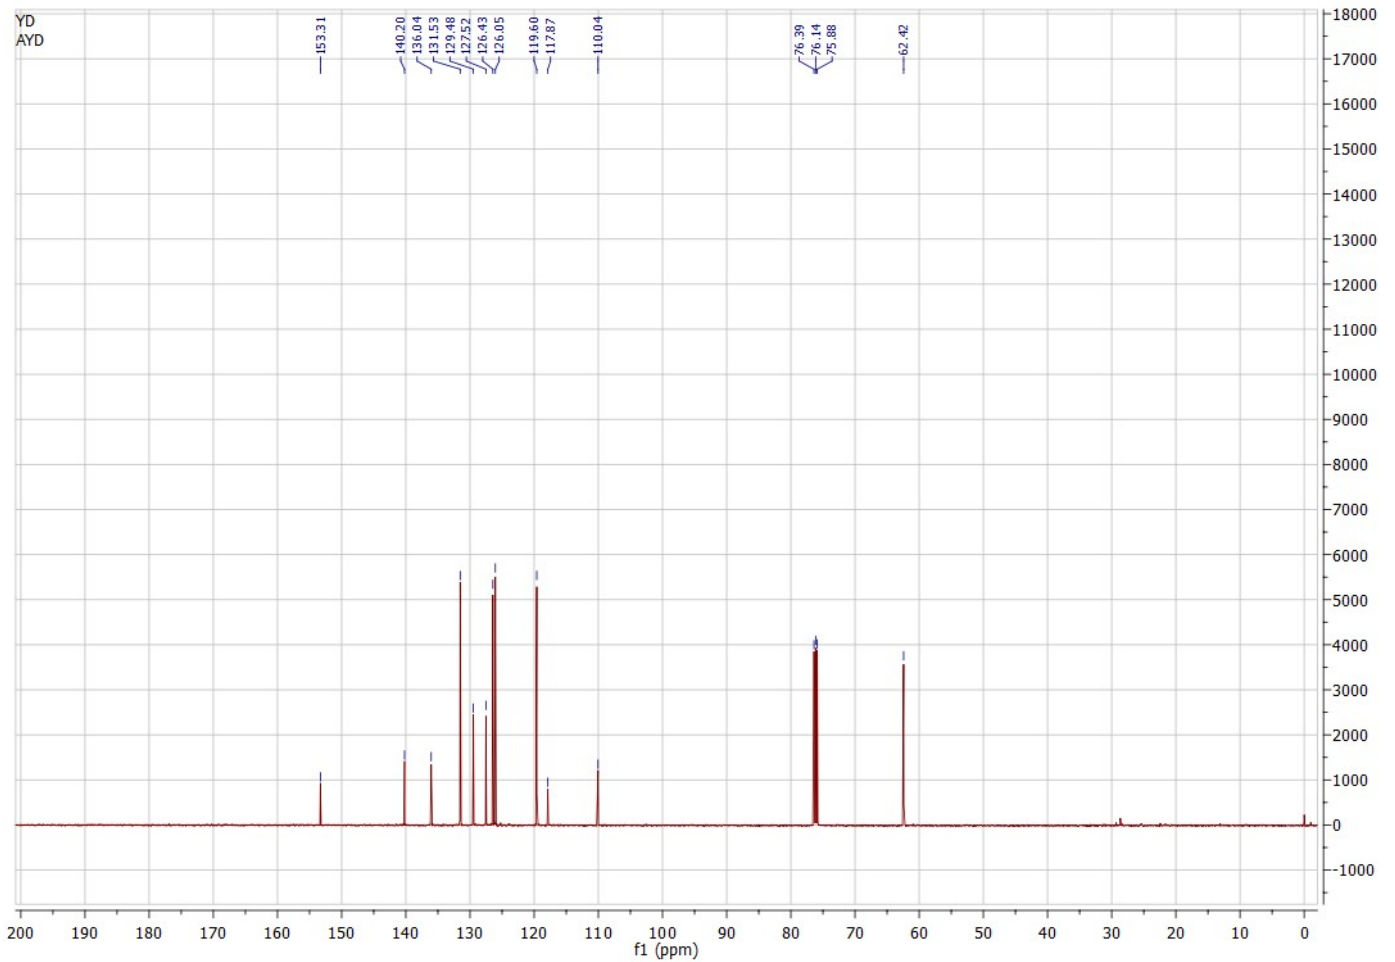

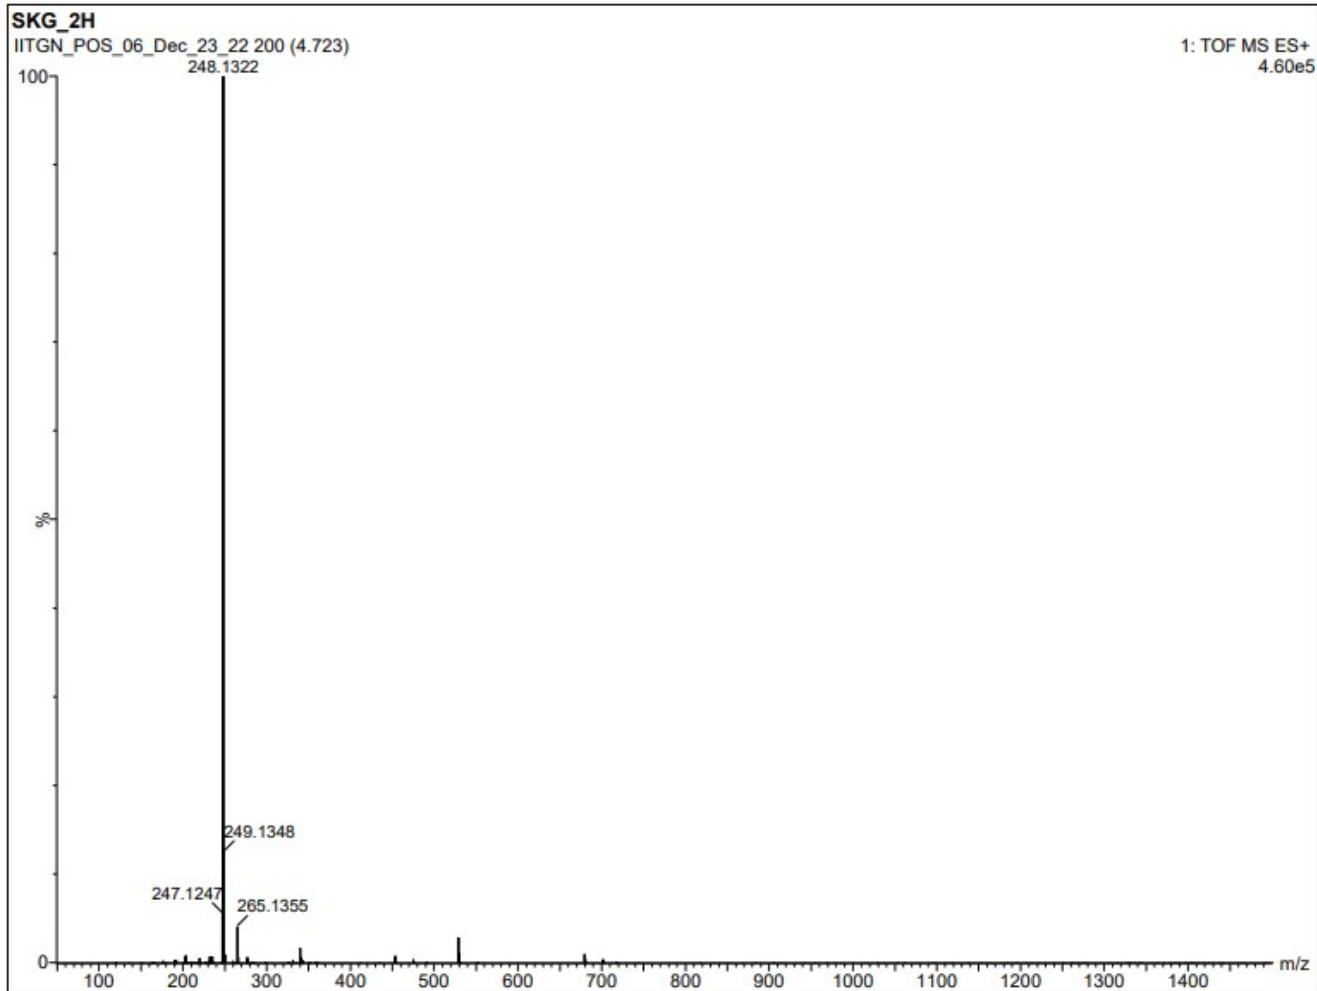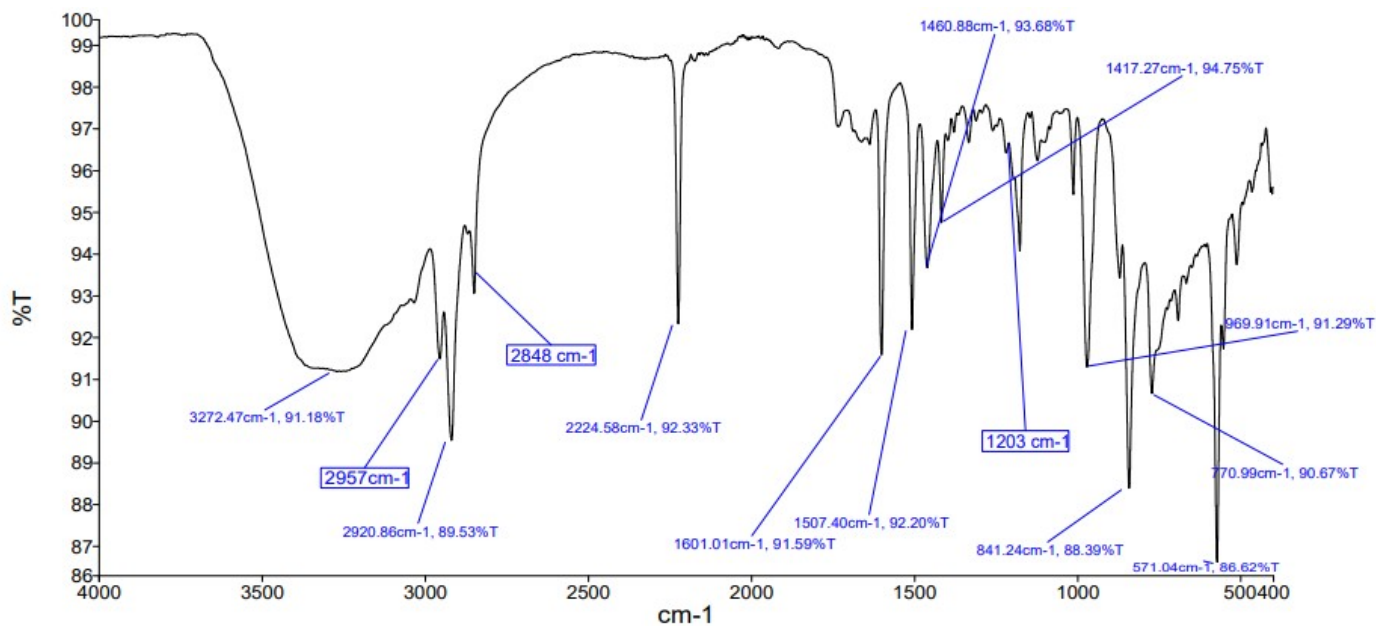

## S12. References

1. Cariati, E., Cavallo, G., Forni, A., Leem, G., Metrangolo, P., Meyer, F., Pilati, T., Resnati, G., Righetto, S., Terraneo, G. and Tordin, E., *Crystal growth & design*, 2011, *11*(12), 5642-5648.
2. Mukherjee, T., Siva, M. A., Bajaj, K., Soppina, V., & Kanvah, S., *J. Photochem. Photobiol. B: Biol.*, 2020, *203*, 111732.
3. Y. Dubey, P. Mahalingavelar, D. Rajput, D. J. Shewale, V. Soppina and S. Kanvah, *Org. Biomol. Chem.*, 2023, **21**, 8393-8402.
